# Supplementary material for: An NmrA-Like Protein, Lws1, Is Important for Pathogenesis in the Woody Plant Pathogen Lasiodiplodia theobromae
Source: MDPI journal article supplement (doi:10.3390/plants11172197), 2022-08-24
Supplement: s1 [file s1]

**Table S1** Primers used in this study.

| Primer name                 | Sequence (5'-3')                             | Use of primer                                                            |
|-----------------------------|----------------------------------------------|--------------------------------------------------------------------------|
| Lws1 <sup>1-246</sup> B-f   | GCCATGGAGGCCGAATTCATGGCCA<br>AGCAGCGTGTTCT   | Used for the construction of <i>pGBKT7-Lws1<sup>1-246</sup></i> vector   |
| Lws1 <sup>1-246</sup> B-r   | ACGGATCCCCGGGAATTCTTACTCCT<br>TACTTTCGCCTC   |                                                                          |
| Lws1 <sup>247-324</sup> B-f | GCCATGGAGGCCGAATTCATGGCCA<br>AGATTAACGGCGA   | Used for the construction of <i>pGBKT7-Lws1<sup>247-324</sup></i> vector |
| Lws1 <sup>247-324</sup> B-r | ACGGATCCCCGGGAATTCTCACAAG<br>AAGTCGTAGTGC    |                                                                          |
| Lws1B-f                     | GCCATGGAGGCCGAATTCATGGCCA<br>AGCAGCGTGTTCT   | Used for the construction of <i>pGBKT7-Lws1</i> vector                   |
| Lws1B-r                     | ACGGATCCCCGGGAATTCTCACAAG<br>AAGTCGTAGTGC    |                                                                          |
| Lws1A-f                     | GCCATGGAGGCCAGTGAATTCATGG<br>CCAAGCAGCGTGTT  | Used for the construction of <i>pGADT7-Lws1</i> vector                   |
| Lws1A-r                     | CAGCTCGAGCTCGATGGATCCTCACA<br>AGAAGTCGTAGTGC |                                                                          |
| AreA <sup>1-480</sup> A-f   | ATGGAGGCCAGTGAATTCATGTCGG<br>ACGCGCAACA      | Used for the construction of <i>pGADT7-LtAreA<sup>1-480</sup></i> vector |
| AreA <sup>1-480</sup> A-r   | CCCACCCGGGTGGAATTCTCATCCCG<br>CTGCCGAAACGTTG |                                                                          |
| AreA <sup>481-929</sup> A-f | ATGGAGGCCAGTGAATTCATGCCAC<br>CTCCGCCTTTCTCG  | Used for the construction of <i>pGADT7-LtAreA<sup>481-929</sup></i>      |

|                             |                                               |                                                                     |
|-----------------------------|-----------------------------------------------|---------------------------------------------------------------------|
| AreA <sup>481-929</sup> A-r | CCCACCCGGGTGGAATTCCTACAAG<br>CTCATTGTCAGC     | <sup>929</sup> vector                                               |
| AreA <sup>1-121</sup> A-f   | ATGGAGGCCAGTGAATTCATGTCGG<br>ACGCGCAACA       | Used for the construction of <i>pGADT7-LtAreA<sup>1-12</sup></i>    |
| AreA <sup>1-121</sup> A-r   | CCCACCCGGGTGGAATTCTCATTGGG<br>TGCCTATGGGGT    | <sup>1</sup> vector                                                 |
| AreA <sup>122-149</sup> A-f | ATGGAGGCCAGTGAATTCATGATAT<br>GGAAGCTTTACAACAA | Used for the construction of <i>pGADT7-LtAreA<sup>122-149</sup></i> |
| AreA <sup>122-149</sup> A-r | CCCACCCGGGTGGAATTCTCACATCG<br>ACATCATCCGCC    | <sup>149</sup> vector                                               |
| AreA <sup>150-480</sup> A-f | ATGGAGGCCAGTGAATTCATGAACC<br>TGCGGAAAATGCGTA  | Used for the construction of <i>pGADT7-LtAre<sup>150-480</sup></i>  |
| AreA <sup>150-480</sup> A-r | CCCACCCGGGTGGAATTCTCATCCCG<br>CTGCCGAAACGTTG  | <sup>0</sup> vector                                                 |
| Lws1OE-f                    | ATGAATTCATGGCCAAGCAGCGTGT<br>TCT              | Used for the construction of <i>Lws1</i> overexpression vector      |
| Lws1OE-r                    | CATGGATCCTCACAAGAAGTCGTAG<br>TGC              |                                                                     |
| Lws1RNAi-Sf                 | ATAAGCTTGGAGCAAGTGTACAATC                     |                                                                     |
| Lws1RNAi-Sr                 | TATGAATTCCATCGCTGCACGTGAA                     |                                                                     |
| Lws1RNAi-A<br>Sf            | AACTGCAGTGATGTTTGGCCGCT                       | Used for the construction of <i>Lws1</i> RNAi vector                |
| Lws1RNAi-A<br>Sr            | ATAGGATCCGGAGCAAGTGTACAA                      |                                                                     |

---
